# Supplementary material for: Depolymerization of lignin into cycloalkanes over a hydrotalcite-derived NiFe alloy catalyst
Source: Royal Society of Chemistry journal article supplement (doi:10.1039/d4ta07285e), 2024-12-12
Supplement: d4ta07285e1.pdf [file d4ta07285e1.pdf]

## Supporting Information

### Depolymerization of Lignin Disassembly into Cycloalkanes over Hydrotalcite-derived NiFe Alloy Catalyst

Hairui Jiao<sup>b</sup>, Yushuai Sang<sup>c</sup>, Hong Chen<sup>a,\*</sup>, Yongdan Li<sup>c,\*</sup>

<sup>a</sup> School of Environmental Science and Engineering, Tianjin University, Tianjin 300072, China

<sup>b</sup> Collaborative Innovation Center of Chemical Science and Engineering, Tianjin Key Laboratory of Applied Catalysis Science and Technology, State Key Laboratory of Chemical Engineering, School of Chemical Engineering, Tianjin University, Tianjin 300072, China

<sup>c</sup> Department of Chemical and Metallurgical Engineering, School of Chemical Engineering, Aalto University, Kemistintie 1, Espoo FI-00076, Finland

---

\* Corresponding author. E-mail address: chenhong\_0405@tju.edu.cn (H. Chen), yongdan.li@aalto.fi (Y. Li).

Table S1. PPE conversion (%) of Ni<sub>9</sub>Fe<sub>1</sub>/NiAlO<sub>2</sub> with different solvents and with or without H<sub>2</sub>.

Reaction conditions: 500 mg catalyst, 500 mg PPE, 70 mL solvent, 100 °C, 3 h, with (0.8 MPa) or without H<sub>2</sub> pressure.

| Solvent                | H <sub>2</sub> O | Methanol | Ethanol | Isopropanol | n-Dodecane |
|------------------------|------------------|----------|---------|-------------|------------|
| With H <sub>2</sub>    | 8.5              | 10.1     | 19.8    | 33.4        | 99.8       |
| Without H <sub>2</sub> | -                | -        | -       | -           | -          |

Table S2. EXAFS fitting parameters at the Ni K-edge for various samples.

| Samples                                             | Shell             | $CN$       | $R$ (Å) | $\sigma^2$ (Å <sup>2</sup> ) | $\Delta E_0$ (eV) | $R$ factor |
|-----------------------------------------------------|-------------------|------------|---------|------------------------------|-------------------|------------|
| Ni foil                                             | Ni-Ni             | 12         | 2.5     | 0.006                        | 6.3 (0.6)         | 0.003      |
| NiO                                                 | Ni-O              | 6.1 (0.3)  | 2.1     | 0.009                        | -2.4 (1.1)        | 0.006      |
|                                                     | Ni-Ni             | 11.9 (0.4) | 3.0     | 0.008                        |                   |            |
| Ni <sub>9</sub> Fe <sub>1</sub> /NiAlO <sub>z</sub> | Ni-O              | 6          | 2.1     | 0.010                        | 2.4 (2.5)         | 0.01       |
|                                                     | Ni-M <sub>1</sub> | 12         | 2.6     | 0.015                        |                   |            |
|                                                     | Ni-M <sub>2</sub> | 12         | 3.0     | 0.014                        |                   |            |

$CN$ , coordination number;  $R$ , distance between absorber and backscatter atoms;  $\sigma^2$ , the Mean Square Relative Displacement (MSRD);  $\Delta E_0$ , energy shift interpreted as the alignment of the energy grids of the data and the theory;  $R$  factor indicates the goodness of the fit.

$S_0^2$  was fitted as 0.75 for Ni foil by fixing  $CN$  as the known crystallographic value. Fitting range of Ni foil is  $3.0 \leq k$  (Å<sup>-1</sup>)  $\leq 10.5$  and  $1 \leq R$  (Å)  $\leq 3$ .  $S_0^2$  was fixed as 0.98 for the fitting of NiO. Fitting range of NiO is  $3.0 \leq k$  (Å<sup>-1</sup>)  $\leq 10$  and  $1 \leq R$  (Å)  $\leq 3$ .  $S_0^2$  was fixed as 0.80 for the fitting of Ni<sub>9</sub>Fe<sub>1</sub>/NiAlO<sub>z</sub>. Fitting range of Ni<sub>9</sub>Fe<sub>1</sub>/NiAlO<sub>z</sub> is  $3.0 \leq k$  (Å<sup>-1</sup>)  $\leq 10.4$  and  $1 \leq R$  (Å)  $\leq 3$ .

Table S3. EXAFS fitting parameters at the Fe K-edge for various samples.

| Samples                                 | Shell              | $CN$      | $R(\text{\AA})$ | $\sigma^2(\text{\AA}^{-2})$ | $\Delta E_0(\text{eV})$ | $R$ factor |
|-----------------------------------------|--------------------|-----------|-----------------|-----------------------------|-------------------------|------------|
| Fe foil                                 | Fe-Fe              | 12        | 2.5             | 0.0078                      | 5.8 (2.8)               | 0.005      |
| $\text{Fe}_2\text{O}_3$                 | Fe-O <sub>1</sub>  | 4.2 (1.7) | 2.0             | 0.010                       |                         |            |
|                                         | Fe-O <sub>2</sub>  | 1.8       | 2.2             |                             |                         |            |
|                                         | Fe-Fe <sub>1</sub> | 3         | 3.0             |                             |                         |            |
|                                         | Fe-Fe <sub>2</sub> | 1         | 2.9             | 0.005                       | -1.3 (2.4)              | 0.004      |
|                                         | Fe-Fe <sub>3</sub> | 2         | 3.4             |                             |                         |            |
|                                         | Fe-Fe <sub>4</sub> | 6         | 3.7             | 0.010                       |                         |            |
|                                         | Fe-O <sub>3</sub>  | 3         | 3.9             | 0.006                       |                         |            |
| $\text{Ni}_9\text{Fe}_1/\text{NiAlO}_z$ | Fe-O <sub>1</sub>  | 5.4 (0.7) | 2.0             | 0.014                       |                         |            |
|                                         | Fe-M <sub>1</sub>  | 6.0 (1.3) | 2.6             | 0.023                       | 1.5 (1.2)               | 0.007      |
|                                         | Fe-M <sub>2</sub>  | 5.8 (1.8) | 3.0             | 0.013                       |                         |            |
|                                         | Fe-O <sub>2</sub>  | 4         | 3.3             | 0.028                       |                         |            |

$S_0^2$  was fitted as 0.75 for Fe foil by fixing  $CN$  as the known crystallographic value. Fitting range of Fe foil is  $3.0 \leq k$  ( $\text{\AA}^{-1}$ )  $\leq 11.9$  and  $1 \leq R$  ( $\text{\AA}$ )  $\leq 3$ .  $S_0^2$  was fixed as 1.00 for the fitting of  $\text{Fe}_2\text{O}_3$ . Fitting range of  $\text{Fe}_2\text{O}_3$  is  $3.0 \leq k$  ( $\text{\AA}^{-1}$ )  $\leq 10$  and  $1 \leq R$  ( $\text{\AA}$ )  $\leq 3.5$ .  $S_0^2$  was fixed as 0.85 for the fitting of  $\text{Ni}_9\text{Fe}_1/\text{NiAlO}_z$ . Fitting range of  $\text{Ni}_9\text{Fe}_1/\text{NiAlO}_z$  is  $3.0 \leq k$  ( $\text{\AA}^{-1}$ )  $\leq 8$  and  $1 \leq R$  ( $\text{\AA}$ )  $\leq 3$ .

Table S4 The performance comparison of Ni<sub>9</sub>Fe<sub>1</sub>/NiAlO<sub>2</sub> with previously reported catalysts for model compound and lignin depolymerization.

| Catalysts                                                        | Substrate                   | Reaction condition                   | Major products and selectivity |         | Ref. |                                             |                                                 |                                  |
|------------------------------------------------------------------|-----------------------------|--------------------------------------|--------------------------------|---------|------|---------------------------------------------|-------------------------------------------------|----------------------------------|
| Mo <sub>1</sub> Al/MgO                                           |                             | 200 °C, 4 h, 1 MPa N <sub>2</sub>    |                                | 58<br>% |      | J. Am. Chem. Soc. 2023,<br>145, 12884-12893 |                                                 |                                  |
| Ni-Fe/MCS                                                        |                             | 250 °C, 4 h, 5 MPa H <sub>2</sub>    |                                | 49.1%   |      | 49.9%                                       | Appl. Catal. B-Environ.<br>2019, 253, 348-358   |                                  |
| Br-Ru/SiO <sub>2</sub>                                           |                             | 120 °C, 6 h, 0.5 MPa H <sub>2</sub>  |                                | 44.7%   |      | 45.6%                                       | Angew. Chem. Int. Ed.<br>2021, 60, 12513-125233 |                                  |
| Ni/Ni-PS                                                         |                             | 160 °C, 2 h, 1 MPa H <sub>2</sub>    |                                | 33.8%   |      | 4                                           | 7.6%                                            | Green Chem. 2022, 24,<br>846-857 |
| NiFe(3)/TiO <sub>2</sub> -HT                                     |                             | 250 °C, 1 h, 5 MPa H <sub>2</sub>    |                                | 71.8%   |      |                                             | Chem. Eng. J. 2022, 446<br>136578               |                                  |
| RuRe/H-Beta                                                      |                             | 250 °C, 10 h, 0 MPa H <sub>2</sub>   |                                | 26.1%   |      | 43.8%                                       | J. Energy Chem. 2022,<br>67, 492-49             |                                  |
| Ni <sub>9</sub> Fe <sub>1</sub> /NiAlO <sub>2</sub>              |                             | 100 °C, 3 h, 0.8 MPa H <sub>2</sub>  |                                | 40.5%   |      | 56.8%                                       | This work                                       |                                  |
| Mo <sub>1</sub> Al/MgO                                           | Eucalyptus wood             | 200 °C, 8 h, 1 MPa N <sub>2</sub>    |                                | 92%     |      |                                             | J. Am. Chem. Soc.<br>2023, 145, 12884-<br>12893 |                                  |
| RuRe/H-Beta                                                      | Alkaline lignin             | 200 °C, 2 MPa H <sub>2</sub> , 10 h  |                                | 54%     |      |                                             | J. Energy Chem. 2022,<br>67, 492-49             |                                  |
| Pd/C                                                             | Extracted lignin from birch | 200 °C, 15 h, 4 MPa H <sub>2</sub>   |                                | 90%     |      |                                             | Angew. Chem. Int. Ed.<br>2018, 57, 1356.        |                                  |
| Ru/NbOPO <sub>4</sub> <sup>a</sup>                               | Kraft lignin                | 310 °C, 40 h, 0.5 MPa H <sub>2</sub> |                                | 68%     |      |                                             | Chem, 2019, 5, 1521-<br>1536,                   |                                  |
| Ni <sub>9</sub> Fe <sub>1</sub> /NiAlO <sub>2</sub> <sup>a</sup> | Enzymatic hydrolysis lignin | 300 °C, 6 h, 3 MPa H <sub>2</sub>    |                                | 100%    |      |                                             | This Work                                       |                                  |

<sup>a</sup> Breaking the limit of lignin monomer production

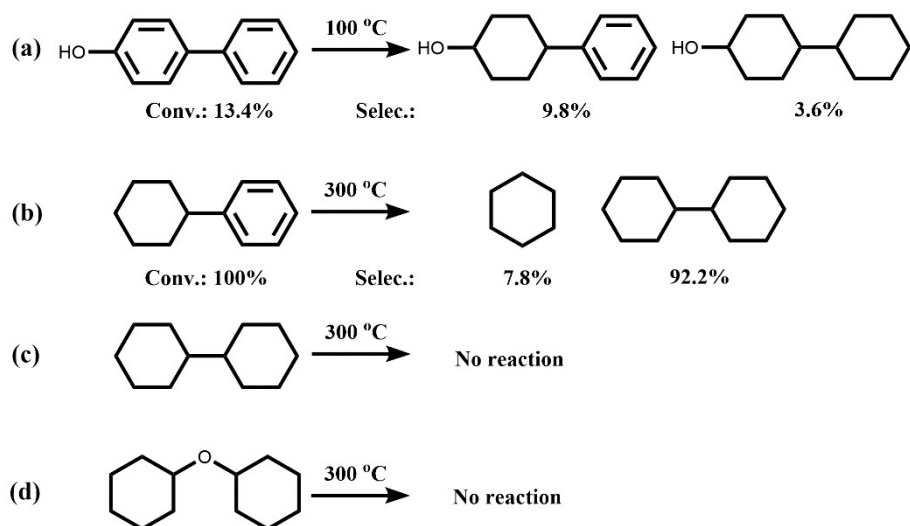

Fig. S1. Product distributions for the conversion of (a) 4-phenylphenol, (b) phenylcyclohexane, (c) bicyclohexyl and (d) cyclohexyloxy-cyclohexane.

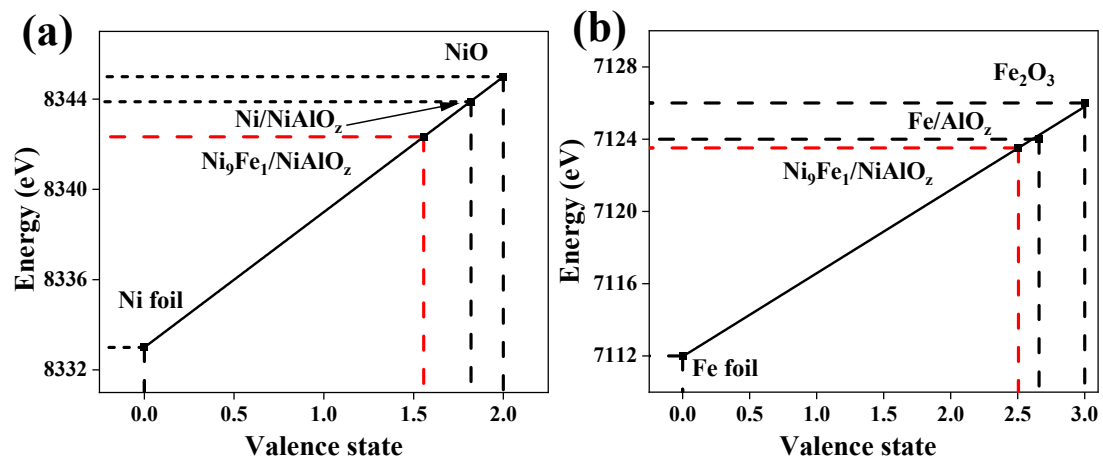

Fig. S2. The valence result of Ni (a) and Fe (b).

|              | $\text{Ni}_9\text{Fe}_1/\text{NiAlO}_z$                                           | $\text{Ni}/\text{NiAlO}_z$                                                        | $\text{Fe}/\text{AlO}_z$                                                            |
|--------------|-----------------------------------------------------------------------------------|-----------------------------------------------------------------------------------|-------------------------------------------------------------------------------------|
| <b>0 S</b>   | 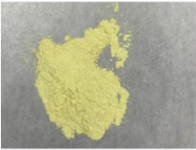 |  |  |
| <b>30 S</b>  |  |  |  |
| <b>180 S</b> |  |  |  |

Fig. S3. Color change photographs of the mixtures.



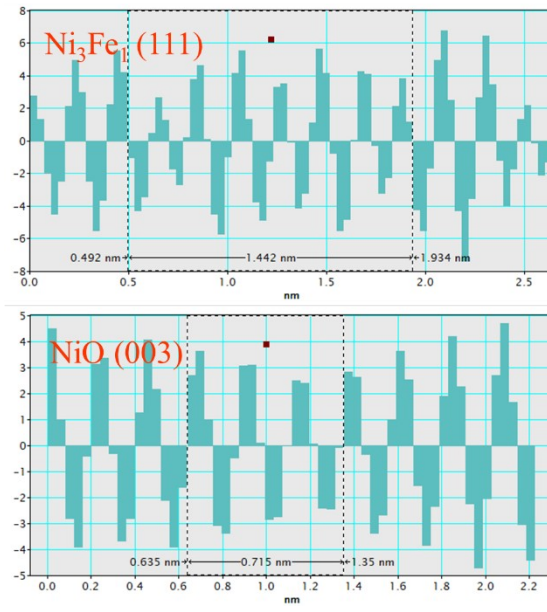

Fig. S4. Lattice stripe calculation for HRTEM.
